# Supplementary material for: Highly Loaded Fe-MCM-41 Materials: Synthesis and Reducibility Studies
Source: Materials (Basel). 2009 Dec 15;2(4):2337–59. doi: 10.3390/ma2042337 (PMC5513583; doi:10.3390/ma2042337)
Supplement: Supplementary file 1 [file materials-02-02337-s001.pdf]

## Highly Loaded Fe MCM-41 Materials: Synthesis and Reducibility Studies

Malose P. Mokhonoana<sup>1</sup> and Neil J. Coville<sup>2,\*</sup>

**Figure SI 1.** Variation of the lattice parameter (A) and BET surface area (B) with Fe content for the Fe-MCM-41 materials prepared in 1 M HNO<sub>3</sub> at 100 °C for 48 h. All samples were calcined at 560 °C for 6 h.

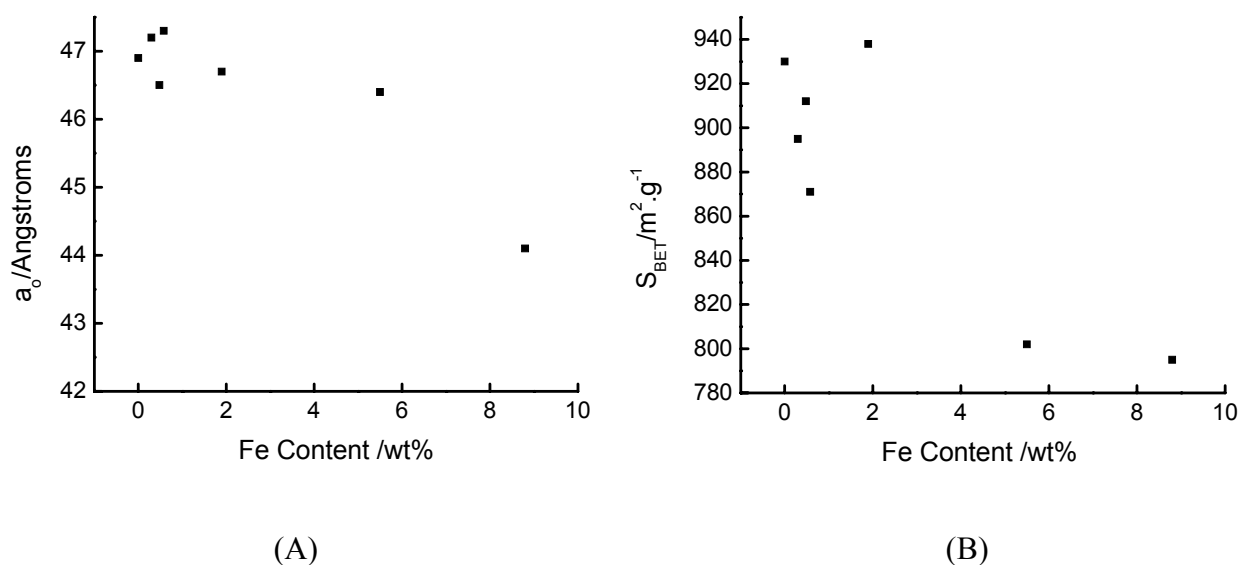

**Figure SI 2.** The full-range XRD plot of the XRD pattern of the 16 wt% Fe-MCM-41 material synthesized hydrothermally using calcined Si-MCM-41 as a SiO<sub>2</sub> source.

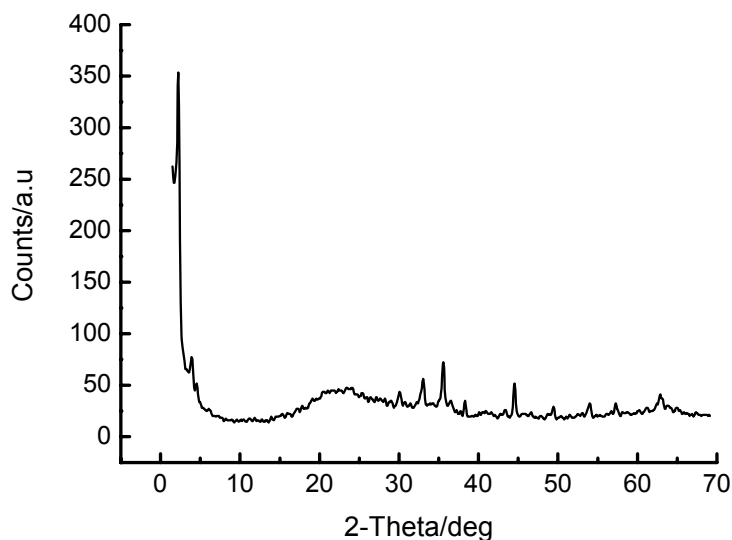

**Figure SI 3.** HRTEM micrograph of 3 wt% Fe-MCM-41 prepared at 80 °C for 6 h using water glass as SiO<sub>2</sub> source. The material was then calcined at 500 °C for 12 h.

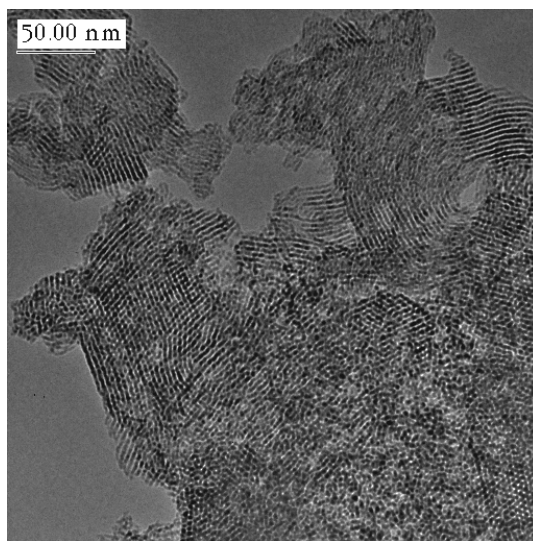

*Figure SI 4* shows that the nature of the precipitating agent has an influence on the structural and textural properties of the 16 wt% Fe-MCM-41. The XRD patterns in *Figure SI 4* show retention of the mesostructure of MCM-41, together with its long-range order of hexagonal channels. In addition, Fe<sub>2</sub>O<sub>3</sub> peaks appear in the high-angle region of the XRD patterns, which are more intense for NaOH and triethanolamine (TEA) than for Na<sub>2</sub>CO<sub>3</sub>. Notably, the metal oxide peaks for the TEA-based material between 20 and 40 °2θ are more intense than the NaOH-based counterpart. These peaks may be related to the reducibility of these materials (see TPR section).

**Figure SI 4.** XRD patterns of 16 wt% Fe-MCM-41 synthesized hydrothermally using the base precipitate route at 100 °C for 2 days. Materials were calcined at 560 °C for 6 h.

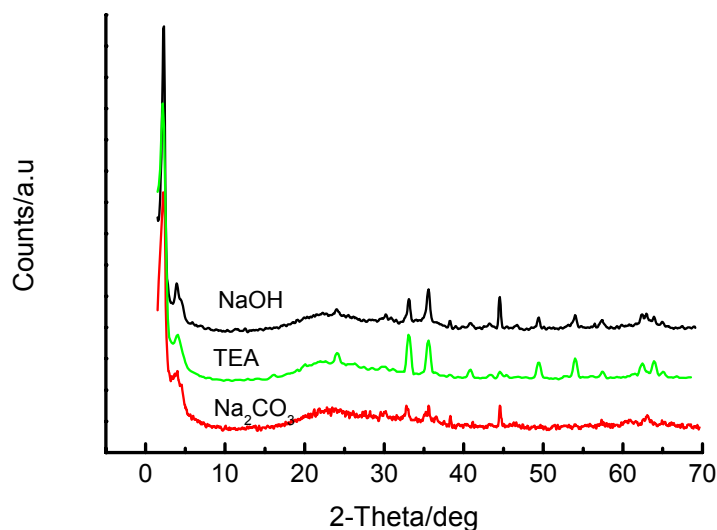

**Figure SI 5.** Variation of the lattice parameter ( $a_0$ ) as a function of Fe loading for Fe-MCM-41 prepared by incipient wetness impregnation of Si-MCM-41 prepared at 100 °C for 2 days.

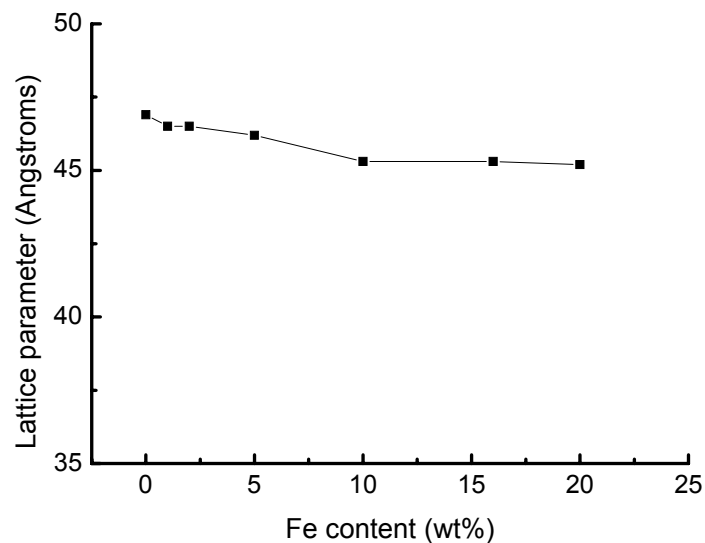

**Figure SI 6.** XRD patterns of Fe-MCM-41 prepared by IWI compared with that of bulk  $\text{Fe}_2\text{O}_3$ : (a) 16 wt% Fe-MCM-41, (b) 50 wt% Fe-MCM-41 and (c) bulk  $\text{Fe}_2\text{O}_3$  (Merck)

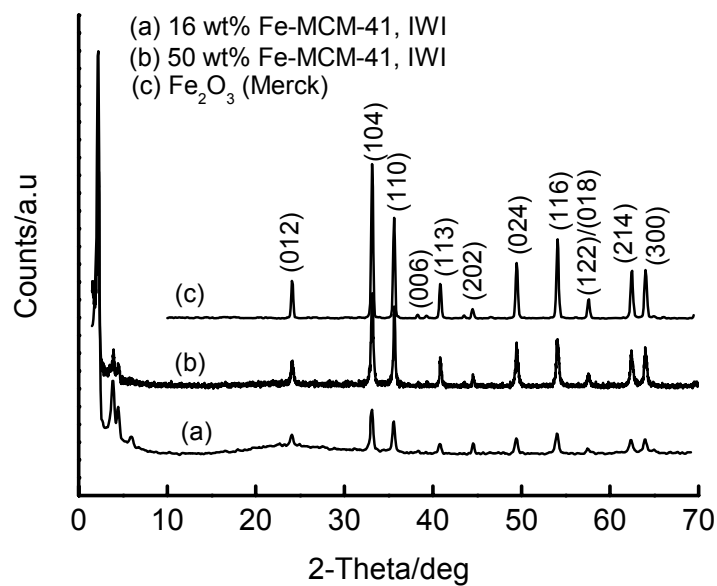

**Figure SI 7.** TPR profiles of (a) 16 wt% Fe-MCM-41 prepared by adding  $\text{Fe}^{3+}(\text{aq})$  to the Si-MCM-41 synthesis gel 2 h after mixing (but prior to hydrothermal treatment and calcination at 560 °C for 6 h) and (b) bulk  $\text{Fe}_2\text{O}_3$ .

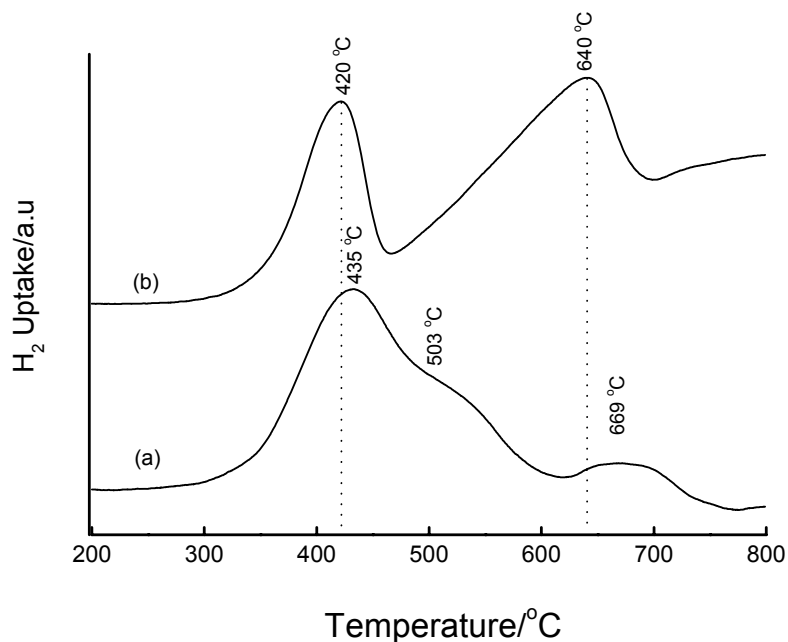

Delaying the addition of the water solution of Fe(III) to the mixed water glass/CTAB/H<sub>2</sub>O gel by 2 h produced a 16 wt% Fe-MCM-41 with some degree of hexagonal order as shown below.

**Figure SI 8.** Low-angle (*left*) and high-angle (*right*) XRD patterns of 16 wt% Fe-MCM-41: A water solution of Fe(III) added 2 h after mixing the water glass/CTAB/H<sub>2</sub>O gel, and the synthesis carried out at 100 °C for 6 h.

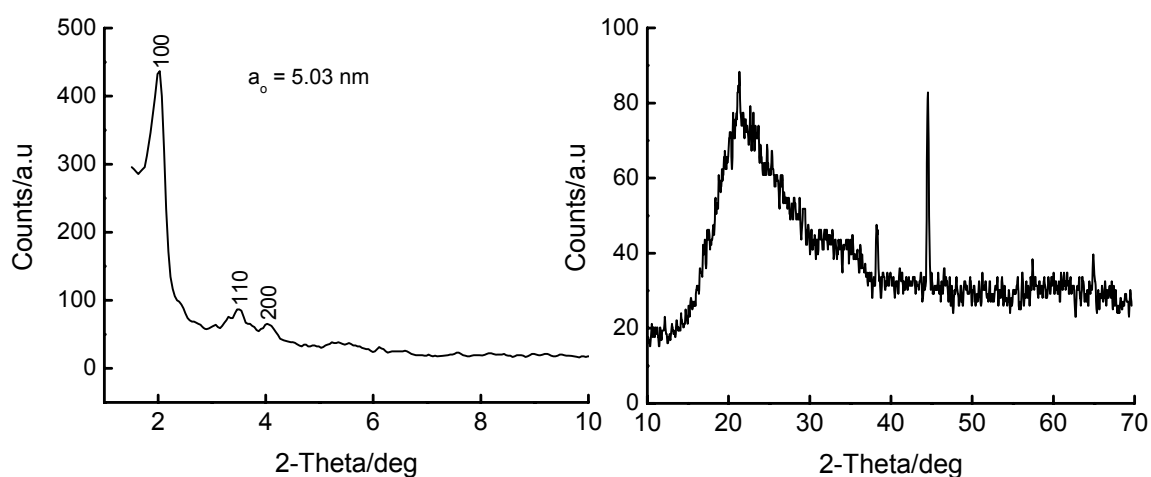

**Figure SI 9.** TPR profiles of 16 wt% Fe-MCM-41 prepared via the OH<sup>-</sup> route at 100 °C for 5 days: (a) calcined at 450 °C for 12 h, and (b) calcined at 560 °C for 6 h.

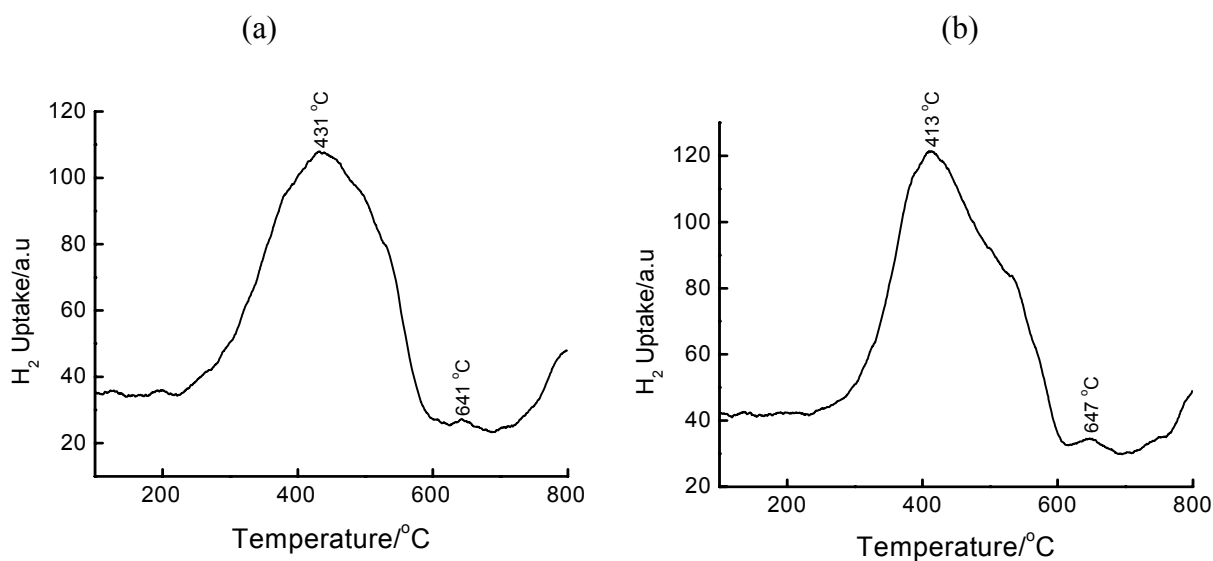

**Table SI 1.** A summary of the structural and textural data of the Fe-MCM-41 materials prepared hydrothermally via the OH<sup>-</sup> precipitate route.

| Wt% Fe | $a_0/\text{\AA}^a$ | $S_{\text{BET}}/\text{m}^2 \cdot \text{g}^{-1} \text{ sample}^b$ | $S_{\text{BET}}/\text{m}^2 \cdot \text{g}^{-1} \text{ support}^c$ |
|--------|--------------------|------------------------------------------------------------------|-------------------------------------------------------------------|
| 0      | 47.0               | 930                                                              | 930                                                               |
| 5      | 45.3               | 879                                                              | 926                                                               |
| 10     | 43.8               | 691                                                              | 768                                                               |
| 16     | 44.4               | 546                                                              | 650                                                               |
| 20     | 46.2               | 429                                                              | 536                                                               |

<sup>a</sup> Error bar is  $\pm 0.6$ , <sup>b</sup> Surface area per gram of Fe-MCM-41, <sup>c</sup> Surface area per gram of Si-MCM-41, *i.e.*, the mass of Fe-MCM-41 corrected for the mass of Fe in the sample to leave only the SiO<sub>2</sub> component.
